# Supplementary material for: Human Milk Omega-3 Fatty Acid Composition Is Associated with Infant Temperament
Source: Nutrients. 2019 Dec 4;11(12):2964. doi: 10.3390/nu11122964 (PMC6949911; doi:10.3390/nu11122964)
Supplement: Supplementary file 1 [file nutrients-11-02964-s001.pdf]

## Supplemental Materials

**Table 1s.** Exploratory analysis of the association between the fatty-acid concentration of milk at 3-months and negative affectivity at 6-months (N = 44)

|                | Negative Affectivity                                 | Negative Affectivity Subscales                       |                                                      |                                                      |                                                      |
|----------------|------------------------------------------------------|------------------------------------------------------|------------------------------------------------------|------------------------------------------------------|------------------------------------------------------|
|                |                                                      | Sadness                                              | Distress to Limitations                              | Fear                                                 | Falling Reactivity                                   |
|                | <i>Standardized <math>\beta</math><br/>(p-value)</i> |
| Omega-3        | -.216 (.187)                                         | -.300 (.069)                                         | -.113 (.499)                                         | -.195 (.238)                                         | -.032 (.848)                                         |
| Omega-6        | .056 (.735)                                          | .025 (.881)                                          | .053 (.753)                                          | -.050 (.764)                                         | .160 (.338)                                          |
| n-6/3 ratio    | .340 (.034)*                                         | .400 (.013)*                                         | .291 (.075)                                          | .121 (.463)                                          | .240 (.302)                                          |
| Total PUFAs    | .032 (.836)                                          | -.002 (.989)                                         | .038 (.891)                                          | -.064 (.698)                                         | .144 (.390)                                          |
| Total Milk Fat | .090 (.568)                                          | .054 (.735)                                          | .127 (.424)                                          | -.004 (.979)                                         | .116 (.466)                                          |

*Note: All coefficients are statically adjusted for maternal age, mother's marital status, and infant birth weight. \*  $p < .05$ .*
